# Supplementary material for: Cohesin acetyltransferase Esco2 regulates SAC and kinetochore functions via maintaining H4K16 acetylation during mouse oocyte meiosis
Source: PubMed Central journal article supplement — Nucleic Acids Res. 2017 Jun 27;45(16):9388–97. doi: 10.1093/nar/gkx563 (PMC5766191; doi:10.1093/nar/gkx563), 2017-06-27
Supplement: gkx563_supp.pdf [file gkx563_supp.pdf]

## Supplementary Materials

Lu et al, Supplementary figure S1

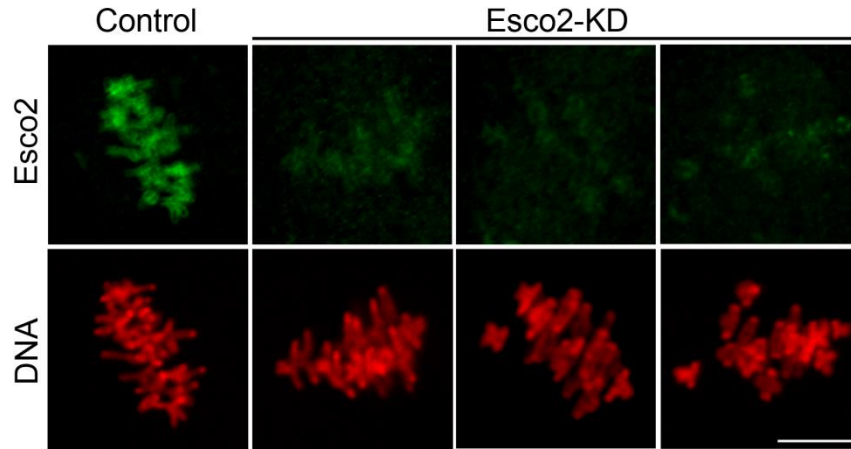

### Supplementary figure S1:

The expression of Esco2 is reduced after Esco2 depletion. Esco2 in control and Esco2-KD oocytes was immunostained with anti-Esco2 antibody and counterstained with PI for DNA. Green: Esco2; Red: DNA. Scale bar, 5 $\mu$ m.

Lu et al, Supplementary figure S2

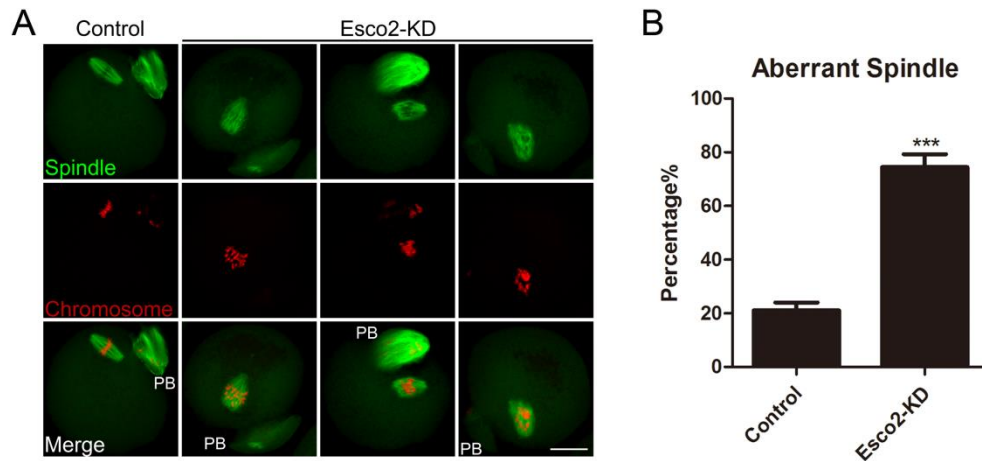

**Supplementary figure S2:**

Depletion of Esco2 causes spindle defects in MII oocytes. (A) Representative images of spindle morphologies in control and Esco2-KD oocytes. Scale bar, 20 $\mu$ m. (B) The rate of abnormal spindles was recorded in control and Esco2-KD oocytes. Data were presented as mean percentage (mean  $\pm$  SEM) of at least three independent experiments. Asterisk denotes statistical difference at a  $p < 0.05$  level of significance.

Lu et al, Supplementary figure S3

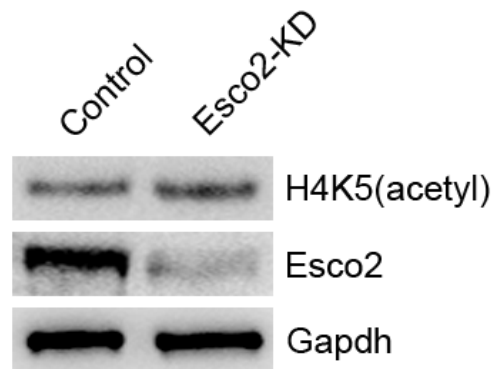

**Supplementary figure S3:**

Depletion of Esco2 does not affect H4K5 acetylation level in oocytes. The acetylation levels of H4K5 in control and Esco2-KD oocytes were examined by western blotting with anti-H4K5ac antibody.
